1

2

3

4 **Title:** Physiological variation reflects bioclimatic differences in the *Drosophila americana* species  
5 complex.

6

7 **Running title:** Environmental differentiation in the *D. americana* species complex

8

9 Jeremy S. Davis<sup>1\*</sup>, Leonie C. Moyle<sup>1</sup>

10 <sup>1</sup>Dept. of Biology, Indiana University, Bloomington, IN, USA 47405

11 \*Corresponding author: [jsd2@indiana.edu](mailto:jsd2@indiana.edu)

12

13

14

15

16

17

18

19

20

21 **Abstract**

22 **Background:** Disentangling the selective factors shaping adaptive trait variation is an important but  
23 challenging task. Many studies—especially in *Drosophila*—have documented trait variation along  
24 latitudinal or altitudinal clines, but frequently lack resolution about specific environmental gradients  
25 that could be causal selective agents, and often do not investigate covariation between traits  
26 simultaneously. Here we examined variation in multiple macroecological factors across geographic  
27 space and their associations with variation in three physiological traits (desiccation resistance, UV  
28 resistance, and pigmentation) at both population and species scales, to address the role of abiotic  
29 environment in shaping trait variation.

30 **Results:** Using environmental data from collection locations of three North American *Drosophila*  
31 species—*D. americana americana*, *D. americana texana* and *D. novamexicana*—we identified two  
32 primary axes of macroecological variation; these differentiated species habitats and were strongly  
33 loaded for precipitation and moisture variables. In nine focal populations (three per species) assayed for  
34 each trait, we detected significant species-level variation for both desiccation resistance and  
35 pigmentation, but not for UV resistance. Species-level trait variation was consistent with differential  
36 natural selection imposed by variation in habitat water availability, although patterns of variation  
37 differed between desiccation resistance and pigmentation, and we found little evidence for pleiotropy  
38 between traits.

39 **Conclusions:** Our multi-faceted approach enabled us to identify potential agents of natural selection and  
40 examine how they might influence the evolution of multiple traits at different evolutionary scales. Our  
41 findings highlight that environmental factors influence functional trait variation in ways that can be  
42 complex, and point to the importance of studies that examine these relationships at both population-  
43 and species-levels.

44

## 45 **Background**

46           Determining how environmental variation shapes trait variation within and between species is  
47 central to our understanding of how natural selection can drive adaptive change. One hallmark of  
48 adaptation is a consistent association between trait variation and one or more aspects of the natural  
49 environment. Classically, these associations have been assessed via the study of clines; by definition,  
50 clines exhibit spatial variation, and geographic space is frequently environmentally heterogeneous, so  
51 traits exhibiting functionally-relevant clinal variation are clear candidates for targets of local selection.  
52 Latitudinal or altitudinal clines have received particular attention in numerous systems, including  
53 *Drosophila*, *Arabidopsis thaliana*, and humans, where analyses indicate strong trait-environment  
54 associations for several physiological and other variants (Adrion et al. 2015, Fournier-Level et al. 2011,  
55 Hancock et al. 2011). Nonetheless, even among these well-characterized examples, the underlying cause  
56 of clinal variation is still not always clear, particularly when trait variation is surveyed across generalized  
57 geographic space as opposed to specific environmental gradients.

58           Macroecological analyses are one useful method for connecting environmental variation to trait  
59 adaptation. Using environmental data from GIS-based databases, these approaches quantify the  
60 direction and magnitude of bioclimatic variation across species ranges. Investigating how these  
61 macroecological factors co-vary with trait variation between populations can identify which aspects of  
62 the environment might be most important for shaping population-level variation and provide insight  
63 into patterns of local adaptation (Kozak et al. 2008). Extending these analyses to include populations  
64 from multiple species across space allows further investigation into how environment is influencing the  
65 evolution of phenotypic differences that manifest at both the species and population levels.

66           In *Drosophila*, patterns of intraspecific clinal variation and species differences have pointed to  
67 several traits as potential targets of environmentally-mediated selection (Adrion et al. 2015). A long  
68 history of latitudinal analyses in North American and Australian *Drosophila melanogaster* have revealed

69 clinal variation in body, egg, and wing size, bristle size, ovariole number, lifetime fecundity, cold  
70 tolerance, and diapause incidence among other traits (Zwaan et al 2000, Coyne and Beecham 1987,  
71 Azevedo et al. 2002, 1996, David and Bocquet 1975, Schmidt et al. 2005, Schmidt and Paaby 2008,  
72 reviewed Adrion et al. 2015). More broadly across *Drosophila*, multiple studies have shown an  
73 association between pigmentation variation and latitude, including within *D. melanogaster* in Europe  
74 (David et al. 1985), Australia (Telonis-Scott et al. 2011), India (Munjal et al. 1997), and sub-saharan  
75 Africa (Pool and Aquadro 2007, Bastide et al. 2014), as well as within *D. simulans* (Capy et al. 1988) and  
76 the *D. cardini* group (Heed and Krishnamurthy 1959). However, despite this wealth of data, in many  
77 cases the environmental and selective factors responsible for driving clinal variation in these traits are  
78 equivocal, and sometimes conflicting. For example, latitudinal studies on thoracic pigmentation in *D.*  
79 *melanogaster* have implicated seasonal and annual temperature variation as the primary selective agent  
80 explaining positive correlations with latitude in Europe (David et al. 1985), Australia (Telonis-Scott et al.  
81 2011), and India (Munjal et al. 1997)—although these patterns can covary with other factors such as  
82 altitude (e.g. in Africa; Pool and Aquadro 2007)—while clinal UV intensity variation has been invoked to  
83 explain an opposing pattern seen in Africa (Bastide et al. 2014). These abiotic factors are proposed to  
84 shape traits directly via selection to increase physiological resilience where environmental conditions  
85 are most stressful. In addition, these factors have also been proposed to shape the relationship between  
86 traits, due to potential pleiotropic effects that changes in cuticle structure might have on multiple  
87 physiological stress responses, including both UV and desiccation resistance, as well as on pigmentation.  
88 For instance, patterns of pigmentation variation have frequently been proposed to be explained by  
89 associated desiccation resistance variation, with studies showing that increased desiccation resistance is  
90 correlated clinally with darker pigmentation in *D. polymorpha* (Brisson et al. 2005), *D. ananassae*  
91 (Parkash et al. 2010), and Indian *D. melanogaster* (Parkash et al. 2008), although this pattern was not  
92 observed in *D. americana* (Wittkopp et al. 2009). Matute and Harris (2013) found no relationship

93 between desiccation resistance and pigmentation in *D. yakuba* and *D. santomea* but observed that  
94 lighter pigmentation confers greater UV resistance—a result that runs contrary to implied latitudinal  
95 patterns in other species. Accordingly, despite the attention received by these traits, their relationships  
96 to potential environmental agents and to each other remains poorly understood in many species.

97         The *Drosophila americana* group provides a good system for investigating how environmental  
98 variation across large spatial regions could influence physiological adaptation within and between  
99 species. This group consists of three members of the *virilis* clade native to North America—the two  
100 subspecies *Drosophila americana americana* and *Drosophila americana texana*, and their sister species  
101 *Drosophila novamexicana*. *D. novamexicana* is localized to the arid southwestern US, while *D. a.*  
102 *americana* and *D. a. texana* each span a wide geographic and climatic range from the great plains in the  
103 west, across to the east coast of North America (Figure 1). While *D. novamexicana* is clearly spatially  
104 differentiated from the two subspecies of *D. americana*, in the absence of quantitative data it's unclear  
105 which of many covarying factors might represent the strongest differences in habitat between this  
106 species and its relatives. Similarly, while the *D. americana* subspecies are generally distributed on a  
107 north (*D. a. americana*) to south (*D. a. texana*) cline, their ranges show substantial overlap (McAllister  
108 2002), and the magnitude and nature of their climatic differences have not previously been quantified.  
109 Further, these species show evidence for variation in both pigmentation and desiccation resistance traits  
110 (Wittkopp et al. 2011, Clusella-Trullas and Terblanche 2011), but the relationship between this variation  
111 and macroecological factors within and between species remains unclear.

112         Here, our goal was to assess whether broad bioclimatic factors shape physiological variation in  
113 the *D. americana* species complex. To do so, we quantified the major axes of environmental variation  
114 within and between species, using climate variables from known occurrence locations. Based on these  
115 major axes, we assessed variation in three relevant physiological traits—desiccation resistance, UV  
116 resistance, and pigmentation—in a nine focal populations, to investigate evidence for associations

117 between trait variation and this putative selective environmental variation. We found evidence for  
118 differentiation among these species in two primary axes of environmental variation, as well as for  
119 desiccation resistance and pigmentation, although patterns of association differed between these traits.  
120 We infer that species-level trait variation is consistent with natural selection imposed by habitat  
121 differences—in particular the influence of moisture availability on variation in desiccation resistance.

122

## 123 **Methods**

### 124 *Experimental Fly stocks*

125 Three stocks from each focal species were obtained from the University of California San Diego  
126 *Drosophila* Species Stock Center (DSSC). We used *Drosophila novamexicana* stocks from San Antonio,  
127 NM, Grand Junction, CO, and Moab, UT (15010-1031.08, 15010-1031.00, and 15010-1031.04  
128 respectively); *D. americana americana* (hereafter *D. a. americana*) stocks from Chinook, MT, Chadron,  
129 NE, and White River, AR (15010-0951.02, 15010-0951.06, and 15010-0951.17 respectively); and, *D.*  
130 *americana texana* (hereafter *D. a. texana*) stocks from New Orleans, LA, Jamestown, SC, and Morrilton,  
131 AR (15010-1041.24, 15010-1041.29, and 15010-1041.23 respectively). All stocks were collected between  
132 1946 and 1950. *D. americana* is divided into subspecies according to presence of a chromosomal fusion  
133 of the X- and 4-chromosomes in *D. a. americana* that shows a distinct latitudinal cline (McAllister 2002).  
134 For simplicity we refer to them by their subspecies names. All fly stocks were reared on standard  
135 cornmeal media prepared by the Bloomington *Drosophila* Stock Center (BDSC) at Indiana University, and  
136 were kept at room temperature (~22C).

137

### 138 *Environmental data*

139 To quantify environmental variation in the natural range of our three focal species, we extracted  
140 bioclimatic variable data from documented collection locations of each species and used these data to

141 create principal components that summarize the major axes of climate variation. First, geographical  
142 coordinate data were obtained for all known collections using TaxoDros ([www.taxodros.uzh.ch](http://www.taxodros.uzh.ch)) – a  
143 database that compiles latitude and longitude coordinates from published collection records. After  
144 curating for duplicates and erroneous or unspecified coordinates, we retained passport data for 10 *D.*  
145 *novamexicana*, 73 *D. a. americana*, and 68 *D. a. texana* population locations. For each of these  
146 geographic locations, we extracted bioclimate variable data from two sources. From the Worldclim 2  
147 database we extracted source location data at 30 arcsecond resolution for 19 bioclimatic variables (Fick  
148 and Hijmans 2017); and, from the CliMond archive (Kriticos et al. 2012) we extracted 16 additional  
149 bioclimatic variables at 10-minute resolution (see supplement). The latter were included despite this  
150 relatively coarse resolution because they contained additional data on ultraviolet (UV) radiation and soil  
151 moisture that were not available in the Worldclim registry. Many of these 35 bioclimatic variables  
152 describe alternative aspects of temperature, precipitation, and seasonality over different time intervals,  
153 so we performed a principal component analysis (PCA) in *R* on all 35 variables across all 149 population  
154 locations to reduce non-independence and redundancy in this dataset. PCA uses orthogonal  
155 transformation to generate a set of linearly uncorrelated principal components that summarize major  
156 axes of variation across a dataset of potentially correlated variables. Because the first 3 PCs explained  
157 ~85% of the variation across populations (see Results), we used values for these PCs in our subsequent  
158 analyses of the relationship between environmental variation and variation in physiological traits.

159

#### 160 *Desiccation resistance assay*

161 To assess population, species, and sex specific differences, desiccation resistance was assayed in  
162 replicate for individual males and females of each of our nine focal populations, using custom  
163 desiccation vials. Virgin flies were isolated within 24 hours of eclosion and aged individually for 3 days  
164 prior to the start of the experiment. Flies were then mouth aspirated individually into a modified

165 *Drosophila* culture vial which contained a layer of 20g of Drierite, 10g of desiccated cork, and a piece of  
166 cheesecloth, and was sealed by a layer of parafilm. Each fly was placed above the cheese cloth and cork  
167 (in order to avoid direct contact with Drierite that negatively effects survival) and observed every 15  
168 minutes until death. Death was assayed by observing the target fly for a total of 2 minutes, gently  
169 tapping the vial and watching for movement; when no limb or mouth movement occurred over that  
170 time, the fly was considered dead. Desiccation resistance was then quantified as the total time in  
171 minutes that each individual survived in a desiccation vial. A minimum of 5 replicates were performed  
172 per sex for each population. Trials were performed in blocks in which one fly of every identity  
173 (population x sex) was assayed simultaneously, to avoid confounding sex or population effects with trial  
174 date. At the end of the survival assay, each individual was weighed to obtain their dry weight (as a proxy  
175 for size) to include as a covariate in survival analyses. Dry (post-death) weight was determined to be an  
176 effective proxy for wet (pre-desiccation) weight in a pilot experiment in which individuals of each  
177 population and sex were weighed before and after individual desiccation trials (Pearson's correlation,  
178 females:  $r(8) = 0.899$ ,  $P < 0.001$ ; males:  $r(8) = 0.925$ ,  $P < 0.001$ ).

179

#### 180 *UV irradiation resistance assay*

181 We assessed UV-B resistance for each sex within each population (including the *D. virilis* line), at  
182 each of four different exposure intensities: 100, 500, 1000, and 5000 Joules/m<sup>2</sup> plus a control assay at 0  
183 J/m<sup>2</sup>. UV resistance trials were performed similarly to Matute and Harris (2013) and Aguilar-Fuentes et  
184 al. (2008). Briefly, virgin males and females of each population were isolated and kept in single-sex  
185 groups of 20 for 24 hours prior to experiment start. Each group of 20 flies was then lightly anesthetized  
186 on a CO2 fly pad and weighed as a group before being irradiated with UV-B light at one of the four  
187 experimental intensities using an ultraviolet Stratalinker 2000 (Stratagene, La Jolla, CA). For the 0J  
188 exposure - which essentially measures longevity in the absence of acute UV exposure - flies were simply



189 anesthetized, weighed, and placed in the Stratalinker without UV exposure. Each group was then  
190 transferred to a vial containing standard cornmeal media and scored once daily for number of flies still  
191 alive. Groups were transferred to fresh food vials as often as necessary—usually every seven days. The  
192 experiment continued until all flies in each vial were dead. Death was assessed here as in desiccation  
193 resistance assay above. For each assayed energy level, trials for both sexes in all ten lines were initiated  
194 simultaneously, to avoid confounding these factors with date effects.

195

#### 196 *Pigmentation assay*

197 Dorsal abdominal pigmentation was assessed on individual males and females from each focal  
198 population in a similar manner to Wittkopp et al. (2011, dataset 'A'). Briefly, individual 7-day old virgin  
199 flies for each sex and population were placed in 10:1 ethanol to glycerol mixture and stored at room  
200 temperature for 1-5 days. The dorsal abdominal cuticle (specifically tergites A3-A5) was dissected from  
201 each fly, isolated from other tissues, and mounted in Hoyer's solution. Each cuticle was then viewed and  
202 digitally imaged on an AMG EVOS FL scope (AMG, Bothell, WA, USA) under standardized light conditions.  
203 Body color was quantified on gray-scale images of each cuticle by calculating the average median pixel  
204 intensity of 20 randomly-selected, non-overlapping regions on a 0-255 scale (avoiding the dorsal midline  
205 which has consistently lighter pigmentation), in Image J (NIH, Bethesda, MD, USA). Five replicate  
206 individuals from each sex within each population were assessed.

207

#### 208 *Statistical analyses*

##### 209 *Environmental differences between species and populations*

210 All statistical analyses were performed in R version 3.4.3, as was figure construction. We tested  
211 for evidence that species significantly differed in environment from one another by performing one-way  
212 ANOVAs with species as the independent variable and each of the first three PC axes as the dependent

213 variables. These analyses were performed both on data from all collection localities used to generate  
214 the PC axes (N=149), and also with only the set of nine focal populations used for our trait analyses. For  
215 each analysis with a significant species effect, we also performed Tukey post-hoc contrasts to determine  
216 which species differed from one another.

217

#### 218 *Trait differences between sex, species, and populations*

219 To assess the distribution of variation in our traits, we analyzed each physiological trait for  
220 differences between species, populations, and sex. For each of desiccation resistance and pigmentation,  
221 we fit a multi-way ANOVA with sex, species, and population nested within species, as independent  
222 variables, and each trait as the response variable. For desiccation resistance, dry weight was also  
223 included as a fixed effect to account for individual body size. For both of these traits we also performed  
224 post-hoc contrasts between each pair of species, using the Tukey test.

225 For UV resistance, effects of sex, species, and treatment level, were assessed using relative  
226 survival analysis and the R package *reliSurv* (Pohar and Stare 2006). For each sex and population identity  
227 we used the 0J UV treatment exposure as the control (baseline) survival in a relative survival model,  
228 where relative survival in days following UV exposure is the response variable. We fit an additive model  
229 with sex, species, and treatment (energy level), as independent variables, to assess their contributions  
230 to UV resistance variation. Both species and treatment required a reference to be used, and we chose *D.*  
231 *americana* and 100J respectively as reference levels. (Results were unaffected by the specific choice of  
232 reference species, and only affected if 5000J was used as treatment reference.) Because we had only  
233 one trial per energy level for each sex within each population, we used our three populations per  
234 species to assess the effects of species identity on UV resistance. Finally, we used the median of a  
235 Meier-Kaplan curve estimate (Therneau 2013)—equivalent to the day in which 50% of the flies in a given  
236 trial are dead—as a summary statistic for UV resistance for each sex in each population at each given

237 treatment level. These median values were used in subsequent analyses of trait-trait associations and  
238 trait associations with environmental PC axes (see below).

239

#### 240 *Environmental variation and association with physiological traits*

241 We first examined how macroecological environmental variation (principal component axes)  
242 were related to desiccation resistance, UV resistance, or pigmentation variation across our nine focal  
243 populations, regardless of species. To do this we calculated Pearson's correlation coefficient with mean  
244 population desiccation resistance survival time, UV resistance at each energy level, and pigmentation  
245 intensity as the response variable to either PC1 or PC2 values for our experimental populations. Then,  
246 because we observed that our PC axes exhibit statistical separation between species—that is, *D.*  
247 *novamexicana* had complete separation from the other two taxa along both PC1 and PC2 axes—we used  
248 a set of modified ANOVAs to evaluate how species and population identity influences trait-environment  
249 associations, for each sex separately. To do so, for each PC we first calculated the residuals from a one-  
250 way ANOVA with species as the independent variable, and then used these residual PC values in our  
251 analyses of population-level effects on each of our three traits. That is, for each of the first three PCs  
252 separately, we fit an ANOVA with residual PC values and species as independent variables, and the mean  
253 population trait value for either desiccation resistance or pigmentation as the response variable; a  
254 similar set of models were performed with UV resistance data from each UV treatment level, but  
255 median Meier-Kaplan curve estimates as the response variable. These analyses allowed us to  
256 simultaneously evaluate the contribution of both species differences and local environmental variation  
257 to variation in each physiological trait, and therefore assess how each PC contributes to variation in a  
258 given trait within each species. Because we performed 14 total tests, the Bonferroni-corrected  
259 significance level is  $p=0.004$  for each trait.

260 Finally, we examined the strength of pairwise associations between each of our phenotypic  
261 traits of interest (desiccation resistance, pigmentation, and UV resistance at each of five levels), using  
262 Pearson's correlation coefficients. Analyses were performed using population means (because each trait  
263 was measured on different individuals and, for UV resistance, groups of individuals), and on each sex  
264 separately (as there was evidence that each trait is moderately to strongly different between sexes; see  
265 results).

266

## 267 **Results**

### 268 *Species differed along major axes of environmental variation*

269 Our final dataset consisted of 149 latitude and longitude collection records across the United  
270 States (10 *D. novamexicana*, 71 *D. a. americana*, and 68 *D. a. texana*) for which we extracted 35  
271 bioclimatic variables to generate principal component (PC) axes of environmental variation. These first 3  
272 PCs explained 85% of the environmental variation across populations. Across all collection records (N =  
273 149), we found that species differ along the environmental axes PC1 ( $F(2, 82.2)$ ,  $P < 0.001$ ) and PC2 ( $F(2,$   
274  $59.76)$ ,  $P < 0.001$ ), but only marginally for PC3 ( $F(2, 3.4)$ ,  $P = 0.065$ ). Post-hoc Tukey tests indicated that  
275 all 3 species differed from one another for both PC1 and PC2 (all  $P$  values  $< 0.001$ ) (Figure 2). Despite  
276 modest power, species comparisons using environmental data from only our nine focal populations  
277 were similar: species differed along PC1 ( $F(2, 6.1)$ ,  $P = 0.0355$ ) and PC2 ( $F(2, 5.6)$ ,  $P = 0.042$ ), but not PC3  
278 ( $F(2, 0.6)$ ,  $P = 0.564$ ). For PC1, *D. novamexicana* focal populations differed from both *D. a. americana* ( $P$   
279  $= 0.033$ ) and *D. a. texana* ( $P = 0.003$ ), although the two *americana* subspecies populations did not differ  
280 ( $P = 0.070$ ); for PC2, *D. novamexicana* differed from *D. a. americana* ( $P = 0.045$ ), but the other two  
281 contrasts (*D. nov* – *D. tex*:  $P = 0.093$ ; *D. am* – *D. tex*:  $P = 0.840$ ) were not significant. Given the high  
282 contribution of PC1 and PC2 to total environmental variation (75.8%, Table S1 and below) and their

283 significant associations with our species, we focused all subsequent analyses of environmental variation  
284 on these two axes, and did not further consider PC3.

285         Based on variable loadings (provided in the supplement; Table S1) we interpret the  
286 environmental significance of each of the first 2 PCs as follows: PC1 (explaining 46.0% variance) was  
287 strongly negatively loaded for the majority of our precipitation and moisture index variables – with the  
288 exception of the seasonality terms; accordingly, higher PC1 values indicate more arid areas with lower  
289 rainfall year-round, and higher daily and seasonal temperature variability. PC2 (explaining 29.8%  
290 variance) was most strongly loaded for radiation and temperature extremes for the positive values, and  
291 negatively loaded for ground moisture variables and temperature/UV seasonality. We therefore  
292 interpret high values of PC2 to indicate year-round high temperature and radiation, with low moisture,  
293 and negative values to indicate areas with year-round high moisture along with high seasonality in  
294 temperature and radiation.

295

296 *Traits differed among both species and populations and, in some cases, sexes*

297         Desiccation resistance differed between species ( $F(2, 29.8)$ ;  $P < 0.001$ ) as well as between  
298 populations within species ( $F(6, 4.5)$ ;  $P < 0.001$ ), but not between sexes ( $F(1, 0.8)$ ;  $P = 0.364$ ); dry weight  
299 (body size) had no effect ( $F(1, 1.3)$ ,  $P = 0.25$ ). Post-hoc Tukey tests indicated significant pairwise  
300 differences between all three species ( $D.nov - D.am$ :  $P < 0.001$ ,  $D.nov - D.tex$ :  $P < 0.001$ ;  $D.am - D.tex$ :  
301  $P = 0.002$ ); *D. novamexicana* had the greatest desiccation resistance, followed by *D. a. texana* and *D. a.*  
302 *americana* (Figure 3). Consistent with this, *D. novamexicana* populations generally performed better  
303 than the other populations, with the exception of one *D. a. texana* population (Morrilton, Arkansas)  
304 which had the third highest survival overall (Figure 4).

305         We found that UV resistance was significantly influenced by sex ( $F(1, 4.22)$ ,  $P < 0.001$ ) with  
306 females living longer in general, and experiencing lower reduction in life expectancy with increasing UV

307 exposure, compared to males. Among energy levels we found that only the 5000J exposure group ( $F(3,$   
308  $12.36)$ ,  $P < 0.001$ ) significantly differed in relative survival from the reference treatment level (100J, see  
309 methods), while 500J ( $F(3, -0.23)$ ,  $P = 0.82$ ) and 1000J ( $F(3, -0.31)$ ,  $P = 0.76$ ) did not. We also found that  
310 *D. novamexicana* ( $F(2, -0.363)$ ,  $P = 0.72$ ) and *D. a. texana* ( $F(2, 1.41)$ ,  $P = 0.16$ ) did not significantly differ  
311 from *D. americana*. For full survival curves for each population, sex, and treatment, see Figure S1.

312 Abdominal pigmentation differed between species ( $F(2, 11.9)$ ,  $P < 0.001$ ) and between  
313 populations within species ( $F(6, 3.1)$ ,  $P = 0.008$ ), and marginally differed between sexes ( $F(1, 0.06)$ ,  $P =$   
314  $0.063$ ). *D. novamexicana* were the lightest flies, and post-hoc Tukey tests confirmed *D. novamexicana*  
315 was significantly less pigmented than *D. a. americana* ( $P < 0.001$ ) or *D. a. texana* ( $P < 0.001$ ), while the  
316 two americana subspecies had similar pigmentation ( $P = 0.96$ ) (Figure 3). With respect to sex-specific  
317 differences, females were marginally less pigmented than males.

318

#### 319 *Modest associations between physiological trait variation and major axes of environmental variation*

320 Across all nine populations, we found modest correlations between PC2 and both desiccation  
321 resistance ( $r(7) = 0.74$ ;  $P = 0.022$ ) and pigmentation ( $r(7) = 0.68$ ;  $P = 0.044$ ), although these do not  
322 survive multiple test correction (Figure 4). Neither trait was associated with PC1 (desiccation:  $r(7) = 0.15$ ;  
323  $P = 0.71$ ; pigmentation:  $r(7) = 0.53$ ;  $P = 0.15$ ) (Figure 4). For UV, among all associations tested between  
324 PCs and median death at each treatment level, including the control 0J exposure treatment (longevity),  
325 the only detected correlations were between PC1 and both 100J treatment survival ( $r(7) = 0.70$ ;  $P =$   
326  $0.036$ ) and longevity ( $r(7) = 0.65$ ;  $P = 0.060$ ), though none of the tests survived Bonferroni-correction. All  
327 other UV results are provided in the supplement (Table S2).

328 When taking into account both species and population-level effects on trait variation, for both  
329 PCs we found that species differences explained desiccation resistance variation among males but not  
330 females (Table 2); in comparison, intraspecific variation in desiccation resistance was not associated

331 with residuals of either PC for either sex (Table 2). For pigmentation variation, in addition to significant  
332 differences among species for both sexes, we found that intraspecific variation was modestly associated  
333 with PC2 for both males and females, although not with PC1 (Table 2). Based on the factor loadings for  
334 PC2 (see methods and Table S1), this latter finding suggests that higher year-round UV exposure and  
335 temperature coupled with low moisture (i.e. positive values of PC2), are associated with relatively  
336 darker pigmentation within each of these species. Unlike the other two traits, for UV resistance, we  
337 found little evidence for consistent associations between quantitative trait variation and  
338 macroecological variation, regardless of sex or treatment level. We found only one significant  
339 association after correcting for multiple testing: for the 5000J treatment, females showed a significant  
340 association with PC2 ( $F(1) = 12.75$ ;  $P = 0.009$ ). Complete results of UV analyses are provided in the  
341 supplemental material (Table S3).

342 For associations between traits, we found that higher desiccation resistance is positively  
343 correlated with lighter pigmentation in males ( $r(7) = 0.70$ ,  $P = 0.036$ ), but only marginally for females  
344 ( $r(7) = 0.59$ ,  $P = 0.091$ )(Figure S2). In contrast, UV resistance was not correlated with pigmentation for  
345 either sex at any of the treatment levels (Table S4). UV resistance was modestly negatively correlated  
346 with desiccation resistance for females at the highest exposure (5000J,  $r(7) = -0.720$ ,  $P = 0.029$ ), but this  
347 association does not survive multiple-testing correction.

348

## 349 Discussion

350 Here we examined differences in environment between occurrence locations of three closely  
351 related North American *Drosophila* species and then evaluated three physiological traits that might have  
352 been shaped by these climatic differences. We found that all three species differed along two major  
353 principal axes of environmental variation that were strongly loaded for precipitation and ground  
354 moisture variables. We also detected differences between species in desiccation resistance and

355 abdominal pigmentation, but not in assayed UV resistance. Although there was little evidence for finer-  
356 scale trait-environment associations within species, broader species differences—especially in  
357 desiccation resistance between *D. novamexicana* and its relatives—are consistent with differential  
358 natural selection imposed by habitats that vary in their frequency of rain and consistency of moisture.  
359 Quantifying macroecological variation across the ranges of these closely related species, as well as the  
360 accompanying patterns of trait variation, therefore enabled us to identify potentially important agents  
361 of climate selection and the scales at which they might be shaping adaptive physiological differences.

362

363 *Water availability characterizes spatial variation and habitat divergence in species distributions*

364 Identifying environmental factors that differentiate closely related species is essential for  
365 understanding the selective agents that could act on trait variation between, and possibly within, these  
366 species. Here we confirmed that *D. novamexicana* is environmentally differentiated from both *D.*  
367 *americana* and *D. texana*, consistent with strong habitat differences between this largely desert-  
368 associated species and its non-xeric relatives. Along our largest axis of environmental variation (PC1,  
369 that explained 46.0% of the variance in bioclimatic variables) *D. novamexicana* had the highest PC1  
370 values, indicative of habitats with low year-round rainfall and ground moisture, and higher daily and  
371 annual temperature and UV fluctuations. Interestingly, this same major axis also differentiated the  
372 southern *D. a. texana* from the northern *D. a. americana* subspecies; *D. a. texana* had the lowest values  
373 of the three species, with population locations characterized by consistently heavier precipitation and  
374 moisture, and smaller temperature fluctuations (Figure 2). Our finding that the same axis differentiates  
375 our two *D. americana* subspecies points to the importance of water availability and covarying  
376 temperature/UV factors in defining geographic differences among all three taxa in this group. This  
377 inference is further supported by similarly strong differentiation between each species in the second



378 largest axis of environmental variation, PC2. High values of PC2 are associated with high peak  
379 temperature and UV values coupled with low ground moisture, and so can be interpreted as dry heat  
380 and heavy sun exposure versus humid warm periods with more consistent and lower peak UV intensity.  
381 While this axis is not loaded strongly for precipitation *per se*, moisture still stands out as explanatory.

382         These data combined indicate the broad importance of water availability for delineating the  
383 geographic distribution of all three species in this group, beyond simple spatial separation. The most  
384 strongly differentiating bioclimatic factors—variation in precipitation and moisture, but also in  
385 temperature and UV—are strong candidates as broad selective agents that might shape trait variation  
386 among these species. Because these macroecological factors themselves generate expectations about  
387 the kinds of traits that might be responding to them—namely, physiological traits associated with  
388 adaptive responses to moisture, UV, and temperature variation—we directly evaluated these  
389 expectations with relevant trait data within and between our species.

390

391 *Desiccation resistance and pigmentation vary with macroecological variation, but patterns differ*  
392 *between traits*

393         Given the macroecological differences between our species, we assayed variation in three traits  
394 to evaluate evidence for climate selection shaping adaptive trait variation: desiccation resistance, UV  
395 resistance, and pigmentation. All three have previously been proposed as targets of natural selection  
396 imposed by environmental variation (Matute and Harris 2013, Wittkopp et al. 2011, Karan and Parkash  
397 1998, Bastide et al. 2014, Parkash et al. 2008), either within or between closely related *Drosophila*  
398 species. Here we similarly found evidence that variation across species in desiccation resistance  
399 accompanies macroecological differences in moisture availability. Across our nine focal populations,  
400 mean survival times under acute desiccation were associated with our PC2 environmental axis (Figure

401 4); that is, populations that experience year-round high temperature and UV exposure with little ground  
402 moisture (high PC2 values) have consistently higher desiccation resistance than those from regions with  
403 more consistent moisture availability. Moreover, we infer that this association is largely driven by  
404 differences in habitat-imposed selection among species. In particular, *D. novamexicana* was  
405 characterized by the most xeric habitats and had significantly elevated desiccation resistance relative to  
406 its mesic sister species, presumably because this confers improved survivorship throughout a  
407 substantially drier species range. More generally, significant species differentiation both in trait and  
408 environment, and a trait-environment correlation across populations, further strongly suggest that  
409 moisture and other climatic factors associated with PC2 are causal selective agents acting on desiccation  
410 resistance variation among all three species examined.

411 In contrast to desiccation resistance, no consistent trait-environment association emerged from  
412 our analysis of UV resistance, nor were species consistently different, although we did detect a  
413 significant difference between sexes. This lack of association with macroecological variation is  
414 interesting because, just as for moisture and precipitation, our two major PC axes are also loaded for UV  
415 intensity variables. This result might reflect the limitations of extrapolating natural functional  
416 differences in UV tolerance from survivorship after an acute single exposure to UV (a technique that is  
417 commonly used; Matute and Harris 2013, Jacobs 1974, Wang et al. 2008). A more realistic assay,  
418 involving periodic or sustained exposures of lower average dose, might better simulate natural  
419 differences in daily UV exposure associated with macroecological conditions. Nonetheless, despite its  
420 potential shortcomings, we note that our assay did reveal differences in both relative and absolute  
421 survival of males compared to females; across all species, females consistently show a less drastic  
422 reduction in lifespan relative to males, even at the highest UV exposures (Figure S3). This suggests that  
423 our assay was sufficient to capture some aspects of sex-specific biological variation in physiological  
424 responses to UV, and indicates that females in this group show greater high-dosage UV resistance than

425 males. Finally, in addition to greater UV resistance in females, we also detected greater female longevity  
426 in the absence of UV exposure (i.e. at the control, 0J exposure). Greater female longevity is a pattern  
427 seen across many, but not all, *Drosophila* species (Yoon et al. 1990, Durbin and Yoon 1986) and several  
428 factors—including sex-linkage of the underlying causal factors—could explain sex differences in baseline  
429 lifespan, beyond life history differences associated with ecological variation.

430 Our analysis of pigmentation variation revealed yet a third pattern of trait variation among our  
431 populations and species. While we confirmed that differences in abdominal pigmentation in this group  
432 can be stark—*D. novamexicana* has a light almost tan appearance that is quantitatively different from  
433 the dark brown to black of the two *D. americana* subspecies—we also found that pigmentation intensity  
434 did not differ between the *D. americana* and *D. texana* populations we examined here, unlike  
435 differences detected in desiccation resistance. Moreover, while mean pigmentation intensity was  
436 associated with environmental axis PC2 ( $P = 0.044$ ) across all nine populations, this pattern of  
437 association was effectively bimodal: *D. novamexicana* populations had high values for PC2 and low  
438 pigmentation intensity, while the lower PC2 values for populations of both other species were  
439 accompanied by high, relatively invariant, pigmentation intensity (Figure 3, 4). Pigmentation also  
440 differed from desiccation resistance in that we found evidence for sex differences in this trait, that were  
441 absent for desiccation resistance. These results indicate that, although there is evidence that  
442 pigmentation covaries with macroecological climate variation (especially PC2), its specific association  
443 differs from desiccation resistance. This could be due to a number of factors, including the genetic  
444 architecture of pigmentation itself. Wittkopp et al. (2009) have shown that the yellow body color of *D.*  
445 *novamexicana* is a fixed, derived phenotype determined by alleles at the *tan* and *ebony* loci, and  
446 inferred that these alleles pre-date speciation, as they can also be found segregating across populations  
447 of *D. americana*. Furthermore, introgressing either or both of these loci from *D. americana* into *D.*  
448 *novamexicana* produced darker morphs of *D. novamexicana*, with pigmentation closer to that of the

449 donor species (Wittkopp et al. 2011). The observation that exchanging just these two alleles can  
450 substantially alter pigment phenotypes suggests that the genetic architecture of pigmentation variation  
451 might be more simple than desiccation resistance, and less likely to generate phenotypes that vary  
452 incrementally with environmental variation. This difference in genetic architecture might contribute to  
453 differences in the specific trait-environment associations we observed for pigmentation versus  
454 desiccation resistance, even though both traits clearly covary along similar macroecological axes.

455         Finally, we also note that the covariation between pigmentation and desiccation resistance is  
456 most likely shaped by separate responses of each trait to climate variation, rather than by a direct  
457 mechanistic connection between them, as has been previously suggested for other *Drosophila* species  
458 (Brisson et al. 2005, Rajpurohit et al. 2008, Karan and Parkash 1998, Parkash et al. 2008). Although we  
459 did detect a modest correlation between pigmentation and desiccation resistance variation ( $P = 0.036$ ),  
460 previous work in this system provides strong evidence that these traits are not mechanistically  
461 associated. In particular, in their genetic analysis, Wittkopp et al. (2011) found that introgression of  
462 *ebony* or *tan* alleles from *D. americana* into the background of *D. novamexicana* did not alter desiccation  
463 resistance. Based on these data, Wittkopp et al. (2011) concluded that relative humidity was unlikely to  
464 be the selective factor driving evolution of pigmentation variation in *D. americana*. Clusella-Trullas and  
465 Treblanche (2011) reanalyzed this dataset and inferred that mean diurnal temperature range and solar  
466 radiation represented the best model for explaining underlying pigmentation variation. From this, they  
467 inferred that *D. americana* pigmentation variation might be driven by spatial variation in thermal stress,  
468 consistent with the ‘thermal melanism hypothesis’—which proposes that darker pigmentation in colder  
469 regions allows ectotherms to increase and maintain body temperature more rapidly. While we did not  
470 have as broad a sample of pigmentation variation for *D. americana*, our results indicate some support  
471 for this hypothesis: annual solar radiation and mean diurnal range are both loaded highly for PC2,  
472 however several other variables not tested by Clusella-Trullas and Treblanche (2011)—most notably

473 ground moisture variables—were also strongly loaded. It therefore seems reasonable that thermal  
474 regulation may have played a role in evolution of pigmentation in this system, but that it is likely not the  
475 sole factor shaping evolution of this trait.

476

477 *Intraspecific trait variation differs from species-level patterns*

478 While we detected differences between species in environmental factors and in two of our  
479 traits, our data also clearly revealed substantial trait variation between populations within species, and  
480 within populations in some cases. Similar to differences between species, intraspecific variation can  
481 reveal signals of local adaptation when environmental variation among populations is associated with  
482 relevant trait variation between these populations. However, despite ample intraspecific variation for all  
483 three traits, we found little evidence for strong trait-environmental associations at the subspecific level,  
484 at least with the limited sample of populations in which we examined these relationships. Indeed, once  
485 species differences are accounted for, only pigmentation intensity showed evidence for environmental  
486 correlations within species. These associations were modest and, interestingly, in the opposite direction  
487 from the pattern detected between species, such that populations with higher PC2 values tended to be  
488 more darkly pigmented (Figure 4, Table 2). This curious observation implies that factors that are shaping  
489 local patterns of pigmentation might run contrary to the processes that yielded the between-species  
490 pattern—a hypothesis that could be evaluated with future work across a broader set of populations.

491 Apart from limited power, this general lack of strong intraspecific trait-environment associations  
492 could be due to several non-exclusive factors, although in the absence of more direct data they remain  
493 hypotheses. First, while bioclimatic variables can be very effective in describing broad environmental  
494 variation, they do not provide a complete view of local differences in abiotic and biotic environments,  
495 although these might nonetheless be critical for shaping trait-environment relationships. Similarly,

496 populations within our species might be responding to local selective conditions via strategies or  
497 behaviors that are not observable in the experimental assays we used here. For example, factors like  
498 shade availability, proximity to local sources of water, and/or strategies to seek out these areas, may  
499 relax or exacerbate local selection on desiccation stress responses in ways that do not match broad  
500 macroecological climate variation. A similar proposal was suggested by Sillero et al. (2014) to explain a  
501 lack of association between source environment and locomotor activity under thermal stress in these  
502 same species. Second, there could be additional within-species constraints on the mechanisms  
503 underpinning these traits, such that they are either unable to respond more finely to local conditions, or  
504 the fitness benefits of doing so are insufficient to outweigh the benefits of optimizing alternative  
505 functions. One example potentially relevant to desiccation resistance variation involves cuticular  
506 hydrocarbon (CHC) composition—the blend of waxy compounds on the surface of insects—that is  
507 known to be important for desiccation resistance in multiple species, but can also play a role in sexual  
508 communication (reviewed Chung and Carroll 2015). If maintaining effective CHC-mediated sexual  
509 signaling species-wide imposes constraints on local physiological responses in CHC-mediated desiccation  
510 resistance, this could produce a pattern in which species strongly differ in desiccation resistance (in a  
511 way that matches broad environmental variation), but there is no strong local pattern of adaptation in  
512 the same physiological response. Finally, regardless of the specific selective factors responsible, changes  
513 in strength or nature of selection over the evolutionary history of divergence among our species could  
514 also cause patterns of variation to appear more complex.

515

## 516 **Conclusions**

517 Our study took a multi-faceted approach to assessing the environmental factors that could shape  
518 natural variation in several ecologically-relevant physiological traits. We used broad patterns of

519 bioclimatic variation to generate predictions about physiological trait adaptation between species, that  
520 we then evaluated with relevant trait data within and between our species. Our observation that  
521 macroecological variation—in particular water availability—covaries with both pigmentation and  
522 desiccation resistance indicates that abiotic environmental variation is likely important in the adaptive  
523 history of both these traits. Nonetheless, specific patterns of trait-environment association could be  
524 influenced by other factors, such as differences in genetic architecture among traits or local variation in  
525 ecological factors, highlighting the importance of evaluating these relationships at multiple evolutionary  
526 scales.

527

528 **Abbreviations**

529 Not applicable

530 **Declarations**

531 *Ethics approval and consent*

532 Not applicable

533 *Consent for Publication*

534 Not applicable

535 *Availability of data and materials*

536 All data generated or analyzed during this study will be uploaded and linked upon acceptance of article.

537 *Competing interests*

538 The authors declare that they have no competing interests.

539 *Funding*

540 All funding for this work was provided by Indiana University Bloomington Department of Biology.

541 Funding organizations did not play a role in collection, analysis, or interpretation of data

542 *Author's contributions*

543 JSD and LCM conceived and designed the experiment. JSD performed the experiment and statistical

544 analyses. JSD and LCM wrote and edited the manuscript. All authors read and approved manuscript.

545 *Acknowledgements*

546 We thank the *Drosophila* species stock center for providing the population lines used in this study.

547 Research was supported by Indiana University Department of Biology funding to LCM and JSD.

548

549

550 **References**

551 Adrion, J. R., Hahn, M. W., & Cooper, B. S. (2015). Revisiting classic clines in *Drosophila melanogaster* in  
552 the age of genomics. *Trends in Genetics*, 91(2), 165–171.

553 <https://doi.org/10.1016/j.chemosphere.2012.12.037>.Reactivity

554 Azevedo, R. B. R., French, V., & Partridge, L. (1996). Thermal evolution of egg size in *Drosophila*  
555 *melanogaster*. *Evolution*, 50(6), 2338–2345.

556 Azevedo, R. B. R., French, V., & Partridge, L. (2002). Temperature modulates epidermal cell size in  
557 *Drosophila melanogaster*. *Journal of Insect Physiology*, 48, 231–237.

558 Aguilar-Fuentes, J., Fregoso, M., Herrera, M., Reynaud, E., Braun, C., Egly, J. M., & Zurita, M. (2008).

559 p8/TTDA overexpression enhances UV-irradiation resistance and suppresses TFIIH mutations in a



- 560 *Drosophila* trichothiodystrophy model. PLoS Genetics, 4(11), 1–9.  
561 <https://doi.org/10.1371/journal.pgen.1000253>
- 562 Bachli, Gerhard (2018). Taxodros: The database on Taxonomy of *Drosophilidae*. [www.taxodros.uzh.ch](http://www.taxodros.uzh.ch)
- 563 Bastide, H., Yassin, A., Johanning, E. J., & Pool, J. E. (2014). Pigmentation in *Drosophila melanogaster*  
564 reaches its maximum in Ethiopia and correlates most strongly with ultra-violet radiation in sub-  
565 Saharan Africa. BMC Evolutionary Biology, 14(1), 1–14. [https://doi.org/10.1186/s12862-014-](https://doi.org/10.1186/s12862-014-0179-y)  
566 0179-y
- 567 Brisson, J. A., De Toni, D. C., Duncan, I., & Templeton, A. R. (2005). Abdominal pigmentation variation in  
568 *Drosophila polymorpha*: Geographic variation in the trait, and underlying phylogeography.  
569 Evolution, 59(5), 1046–1059. <https://doi.org/10.1111/j.0014-3820.2005.tb01043.x>
- 570 Capy, P., David, J. R., & Robertson, A. (1988). Thoracic trident pigmentation in natural populations of  
571 *Drosophila simulans*: a comparison with *D. melanogaster*. Heredity, 61(2), 263–268.  
572 <https://doi.org/10.1038/hdy.1988.114>
- 573 Chung, H., & Carroll, S. B. (2015). Wax, sex and the origin of species: Dual roles of insect cuticular  
574 hydrocarbons in adaptation and mating. BioEssays, 822–830.  
575 <https://doi.org/10.1002/bies.201500014>
- 576 Clusella-Trullas, S., & Terblanche, J. S. (2011). Local adaptation for body color in *Drosophila americana*:  
577 commentary on Wittkopp et al . Heredity, 106(5), 904–905.  
578 <https://doi.org/10.1038/hdy.2010.141>
- 579 Coyne, J. A., & Beecham, E. (1987). Heritability of Two Morphological Characters Within and Among  
580 Natural Populations of *Drosophila melanogaster*. Genetics, (117), 727–737.
- 581 David JR, Bocquet C. (1975). Evolution in a cosmopolitan species: genetic latitudinal clines in *Drosophila*  
582 *melanogaster* wild populations. Experientia, 31:164–166.
- 583 David, J., Capy, P., Payant, V., & Tsakas, S. (1985). Thoracic trident pigmentation in *Drosophila*  
584 *melanogaster*: Differentiation of geographical populations. Genetics Selection Evolution, 17(2),  
585 211. <https://doi.org/10.1186/1297-9686-17-2-211>
- 586 Durbin, E. J., & Yoon, J. S. (1986). Longevity in the *Drosophila virilis* species Group. I. The *Drosophila*  
587 *virilis* phylad. Ohio Journal of Science, 86(1), 14–17.
- 588 Fick, S.E. and R.J. Hijmans, 2017. Worldclim 2: New 1-km spatial resolution climate surfaces for global  
589 land areas. International Journal of Climatology.
- 590 Fournier-Level, A., Korte, A., Cooper, M. D., Nordborg, M., Schmitt, J., & Wilczek, a. M. (2011). A map of  
591 local adaptation in *Arabidopsis thaliana*. Science, 334(6052), 86–89.  
592 <https://doi.org/10.1126/science.1209271>
- 593 Hancock, A. M., Witonsky, D. B., Alkorta-Aranburu, G., Beall, C. M., Gebremedhin, A., Sukernik, R., ... Di  
594 Rienzo, A. (2014). Adaptations to climate-mediated selective pressures in sheep. Molecular  
595 Biology and Evolution, 31(12), 3324–3343. <https://doi.org/10.1093/molbev/msu264>
- 596 Heed WB, Krishnamurthy NB: Genetic studies on the cardini group of *Drosophila* in the West Indies. Univ  
597 Tex Publ 1959, 5914:155–179.

- 598 Jacobs, M. E. (1974). Beta-alanine and adaptation in *Drosophila*. *Journal of Insect Physiology*, 20(5), 859–  
599 866. [https://doi.org/10.1016/0022-1910\(74\)90175-9](https://doi.org/10.1016/0022-1910(74)90175-9)
- 600 Karan, D., & Parkash, R. (1998). Desiccation tolerance and starvation resistance exhibit opposite  
601 latitudinal clines in Indian geographical populations of *Drosophila kikkawai*. *Ecological*  
602 *Entomology*, 23(4), 391–396. <https://doi.org/10.1046/j.1365-2311.1998.00157.x>
- 603 Kozak, K. H., C. H. Graham, and J. J. Wiens. 2008. Integrating GIS-based environmental data into  
604 evolutionary biology. *Trends in Ecology & Evolution* 23: 141–148.
- 605 Kriticos D.J., Webber B.L., Leriche A., Ota N., Macadam I., Bathols J. & Scott J.K. (2012) CliMond: global  
606 high resolution historical and future scenario climate surfaces for bioclimatic modelling.  
607 *Methods in Ecology and Evolution*, 3: 53-64.
- 608 Matute, D. R., & Harris, A. (2013). The influence of abdominal pigmentation on desiccation and  
609 ultraviolet resistance in two species of drosophila. *Evolution*, 67(8), 2451–2460.  
610 <https://doi.org/10.1111/evo.12122>
- 611 McAllister, B. F. (2002). Chromosomal and allelic variation in *Drosophila americana*: selective  
612 maintenance of a chromosomal cline. *Genome*, 45(1), 13–21. <https://doi.org/10.1139/g01-112>
- 613 Munjal, A., Karan, D., Gibert, P., Moreteau, B., Parkash, R., & David, J. (1997). Thoracic trident  
614 pigmentation in *Drosophila melanogaster*: latitudinal and altitudinal clines in Indian populations.  
615 *Genetics Selection Evolution*, 29(5), 601. <https://doi.org/10.1186/1297-9686-29-5-601>
- 616 Parkash, R., Kalra, B., & Sharma, V. (2010). Impact of body melanisation on contrasting levels of  
617 desiccation resistance in a circumtropical and a generalist *Drosophila* species. *Evolutionary*  
618 *Ecology*, 24(1), 207–225. <https://doi.org/10.1007/s10682-009-9301-9>
- 619 Parkash, R., Rajpurohit, S., & Ramniwas, S. (2008). Changes in body melanisation and desiccation  
620 resistance in highland vs. lowland populations of *D. melanogaster*. *Journal of Insect Physiology*,  
621 54(6), 1050–1056. <https://doi.org/10.1016/j.jinsphys.2008.04.008>
- 622 Pool, J. E., & Aquadro, C. F. (2007). The genetic basis of adaptive pigmentation variation in *Drosophila*  
623 *melanogaster*. *Molecular Ecology*, 16(14), 2844–2851. [https://doi.org/10.1111/j.1365-](https://doi.org/10.1111/j.1365-294X.2007.03324.x)  
624 [294X.2007.03324.x](https://doi.org/10.1111/j.1365-294X.2007.03324.x)
- 625 Rajpurohit, S., Parkash, R., & Ramniwas, S. (2008). Body melanization and its adaptive role in  
626 thermoregulation and tolerance against desiccating conditions in drosophilids. *Entomological*  
627 *Research*, 38(1), 49–60. <https://doi.org/10.1111/j.1748-5967.2008.00129.x>
- 628 Schmidt, P., Matzkin, L., Ippolito, M., & Eanes, W. (2005). Geographic variation in diapause incidence,  
629 life-history traits, and climatic adaptation in *Drosophila melanogaster*. *Evolution*, 59(8), 1721–  
630 1732.
- 631 Schmidt, P. S., & Paaby, A. B. (2008). Reproductive diapause and life-history clines in North American  
632 populations. *Evolution*, 62(5), 1204–1215. <https://doi.org/10.1111/j.1558-5646.2008.00351.x>
- 633 Sillero, N., Reis, M., Vieira, C. P., Vieira, J., & Morales-Hojas, R. (2014). Niche evolution and thermal  
634 adaptation in the temperate species *Drosophila americana*. *Journal of Evolutionary Biology*, 27,  
635 1549–1561. <https://doi.org/10.1111/jeb.12400>

- 636 Telonis-Scott, M., Hoffmann, A. A., & Sgrò, C. M. (2011). The molecular genetics of clinal variation: A  
637 case study of ebony and thoracic trident pigmentation in *Drosophila melanogaster* from eastern  
638 Australia. *Molecular Ecology*, 20(10), 2100–2110. [https://doi.org/10.1111/j.1365-](https://doi.org/10.1111/j.1365-294X.2011.05089.x)  
639 [294X.2011.05089.x](https://doi.org/10.1111/j.1365-294X.2011.05089.x)
- 640 Therneau, T. M, P. M. Grambsch, 2000 Modeling Survival Data: Extending the Cox Model. *Statistics for*  
641 *Biology and Health*.
- 642 Wang, Z. P., Liu, R. F., Wang, A. R., Du, L. L., & Deng, X. M. (2008). Phototoxic effect of UVR on wild type,  
643 ebony and yellow mutants of *Drosophila melanogaster*: Life Span, fertility, courtship and  
644 biochemical aspects. *Science in China, Series C: Life Sciences*, 51(10), 885–893.  
645 <https://doi.org/10.1007/s11427-008-0085-5>
- 646 Wittkopp, P. J., Smith-Winberry, G., Arnold, L. L., Thompson, E. M., Cooley, A. M., Yuan, D. C., ...  
647 McAllister, B. F. (2011). Local adaptation for body color in *Drosophila americana*. *Heredity*,  
648 106(4), 592–602. <https://doi.org/10.1038/hdy.2010.90>
- 649 Wittkopp, P. J., Stewart, E. E., Arnold, L. L., Neidert, A. H., Haerum, B. K., Thompson, E. M., ... Shefner, L.  
650 (2009). Intraspecific polymorphism to intraspecific divergence: genetics of pigmentation in  
651 *Drosophila*. *Science*, 326(5952), 540–544. <https://doi.org/10.1126/science.1176980>
- 652 Yoon, J. S., Gagen, K. P., & Zhu, D. L. (1990). Longevity of 68 species of *Drosophila*. *Ohio Journal of*  
653 *Science*, 90(1), 16–32. Retrieved from <http://hdl.handle.net/1811/23379>
- 654 Zwaan, B. J., Azevedo, R. B. R., James, A. C., Land, J. V., & Partridge, L. (2000). Cellular basis of wing size  
655 variation in *Drosophila melanogaster*: a comparison of latitudinal clines on two continents.  
656 *Heredity*, 84, 338–347.

657 **Table 1: Associations between principal component (PC) axes of environmental variation and**  
 658 **physiological traits for these species. Reported statistics are from multi-way ANOVA models that**  
 659 **include a PC (d.f.=1) and species (d.f.=2) as independent variables, and a given physiological trait as**  
 660 **the dependent variable. Bonferroni corrected significance level is  $P < 0.0004$ .**  
 661

|                | Desiccation Resistance |          |          |          | Pigmentation |          |          |          |
|----------------|------------------------|----------|----------|----------|--------------|----------|----------|----------|
|                | Male                   |          | Female   |          | Male         |          | Female   |          |
|                | <i>F</i>               | <i>P</i> | <i>F</i> | <i>P</i> | <i>F</i>     | <i>P</i> | <i>F</i> | <i>P</i> |
| <b>PC1</b>     | 0.23                   | 0.65     | 0.05     | 0.83     | 0.98         | 0.37     | 0.99     | 0.36     |
| <b>Species</b> | 6.29                   | 0.043    | 2.46     | 0.18     | 45.04        | 0.00063  | 79.4     | 0.00016  |
| <b>PC2</b>     | 0.60                   | 0.47     | 0.97     | 0.37     | 7.26         | 0.043    | 6.53     | 0.051    |
| <b>Species</b> | 6.73                   | 0.038    | 2.91     | 0.14     | 92.33        | 0.00011  | 152.6    | <0.0001  |

662

663 **Table 2: Associations between principal component (PC) axes of environmental variation and UV**  
 664 **resistance, split by treatment. Reported statistics are from multi-way ANOVA models that include a PC**  
 665 **(d.f.=1) and species (d.f.=2) as independent variables, and a given physiological trait as the dependent**  
 666 **variable. Bonferroni corrected significance level is  $P < 0.0004$ .**  
 667

| Energy         | Females  |          |          |          |          |          |          |          |          |          |
|----------------|----------|----------|----------|----------|----------|----------|----------|----------|----------|----------|
|                | 0J       |          | 100J     |          | 500J     |          | 1000J    |          | 5000J    |          |
|                | <i>F</i> | <i>P</i> | <i>F</i> | <i>P</i> | <i>F</i> | <i>P</i> | <i>F</i> | <i>P</i> | <i>F</i> | <i>P</i> |
| <b>PC1</b>     | 4.83     | 0.079    | 3.62     | 0.12     | 0.75     | 0.43     | 0.33     | 0.59     | 0.076    | 0.79     |
| <b>Species</b> | 1.91     | 0.24     | 3.16     | 0.13     | 1.51     | 0.31     | 1.21     | 0.37     | 2.57     | 0.17     |
| <b>PC2</b>     | 6.45     | 0.052    | 4.09     | 0.10     | 2.93     | 0.15     | 0.004    | 0.95     | 3.18     | 0.13     |
| <b>Species</b> | 2.22     | 0.20     | 3.33     | 0.12     | 2.09     | 0.22     | 1.14     | 0.39     | 4.14     | 0.09     |
| Energy         | Males    |          |          |          |          |          |          |          |          |          |
|                | 0J       |          | 100J     |          | 500J     |          | 1000J    |          | 5000J    |          |
|                | <i>F</i> | <i>P</i> | <i>F</i> | <i>P</i> | <i>F</i> | <i>P</i> | <i>F</i> | <i>P</i> | <i>F</i> | <i>P</i> |
| <b>PC1</b>     | 0.94     | 0.38     | 0.76     | 0.42     | 3.73     | 0.11     | 3.20     | 0.13     | 0.70     | 0.70     |
| <b>Species</b> | 0.33     | 0.73     | 2.69     | 0.16     | 7.59     | 0.03     | 0.39     | 0.70     | 0.18     | 0.18     |
| <b>PC2</b>     | 1.48     | 0.28     | 5.31     | 0.069    | 1.04     | 0.35     | 1.78     | 0.24     | 0.045    | 0.045    |
| <b>Species</b> | 0.36     | 0.71     | 4.81     | 0.068    | 5.25     | 0.059    | 0.32     | 0.74     | 0.052    | 0.052    |

668

669

670

671

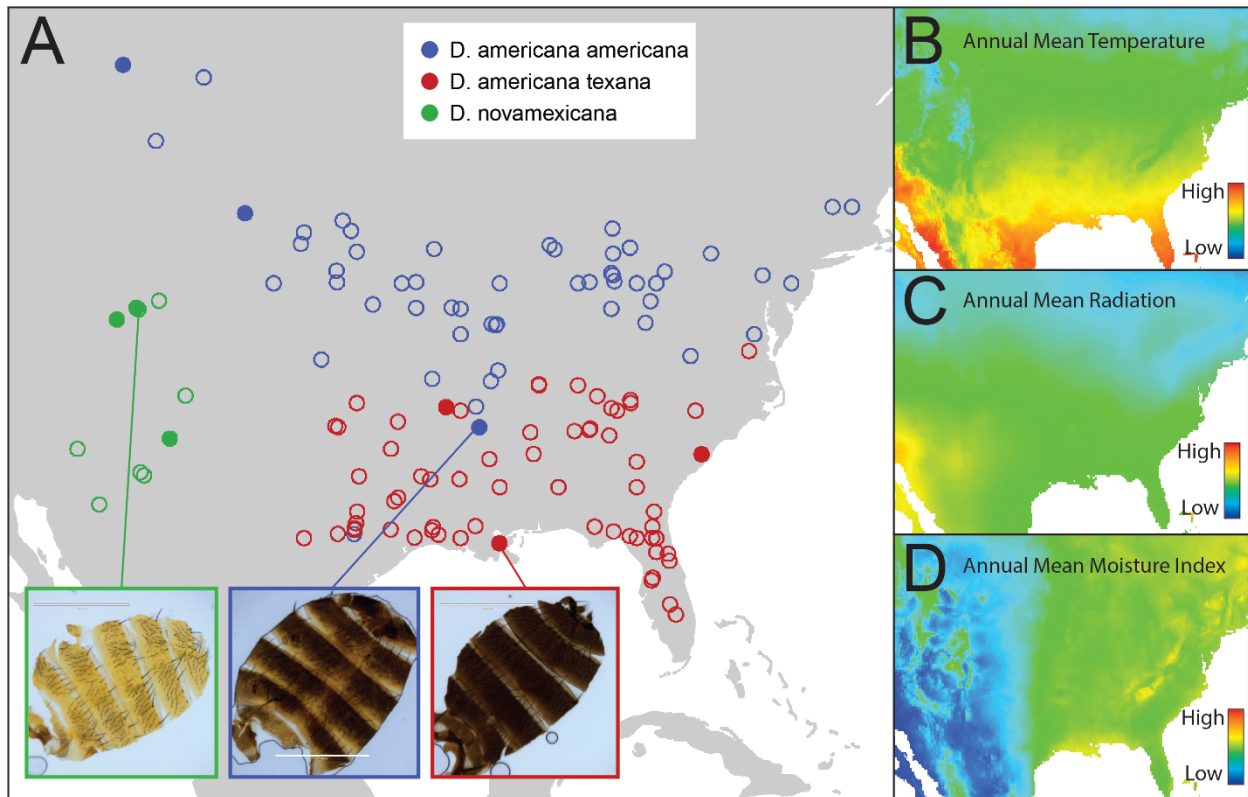

672  
673 **Figure 1: Distribution of collection locations and major environmental variables for our three focal**  
674 **species. Panel A shows collection records for each of *D. novamexicana* (green), *D. a. americana* (blue),**  
675 **and *D. a. texana* (red) as obtained from the TaxoDros database (taxodros.uzh.ch, see methods).**  
676 **Closed circles indicate the nine sample locations for populations used in this study. Panel B-D show**  
677 **heatmaps of spatial variation in annual mean temperature (B), annual mean radiation (C), and annual**  
678 **mean moisture index (D), as obtained from the Worldclim and Climond databases. Cuticle dissection**  
679 **images inset into Panel A are representative male cuticles from (left to right) Grand Junction,**  
680 **Colorado, White River, Arkansas, and New Orleans, Louisiana.**

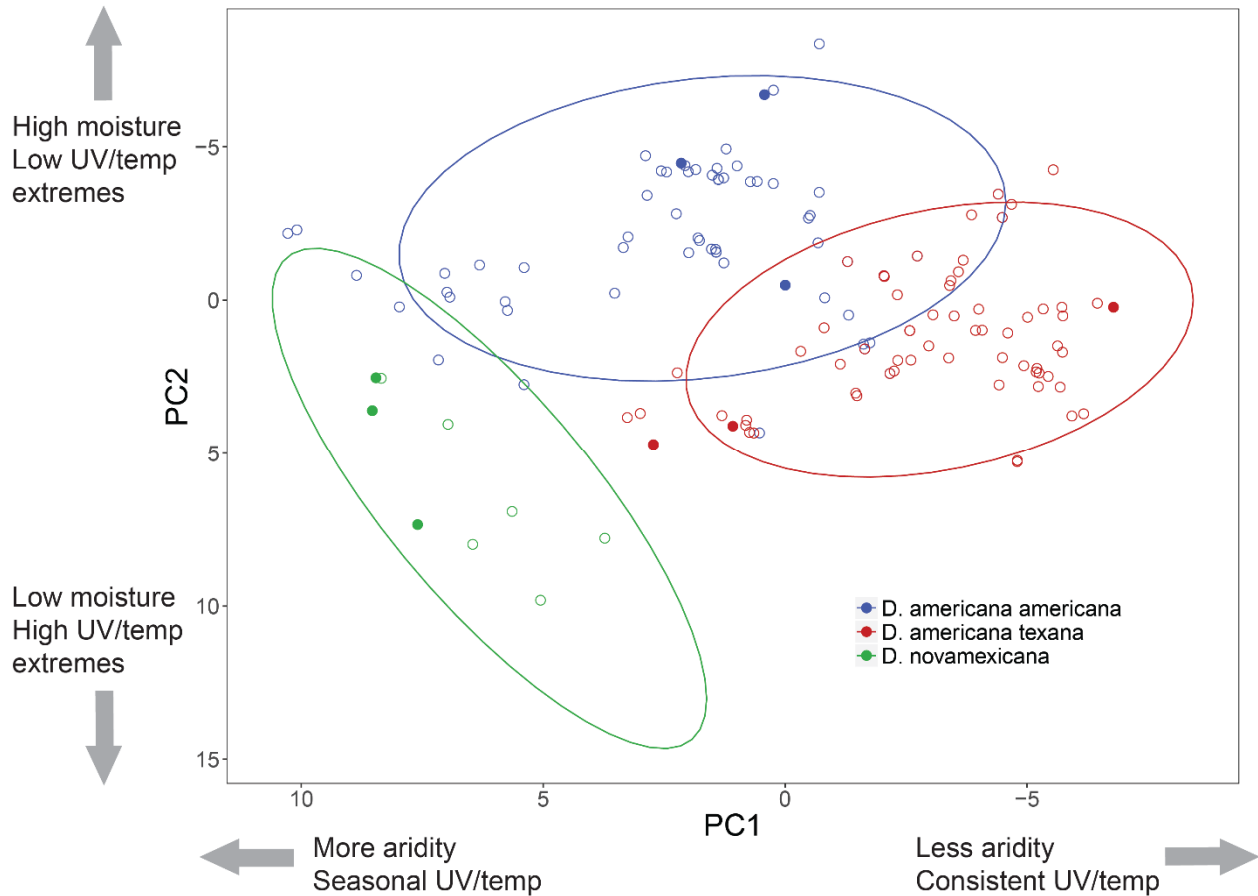

681

682 **Figure 2: PC1 and PC2 values for all collection records (N=149). PC axes are inverted to mirror spatial**  
683 **orientation of populations in geographic space. Filled circles indicate the 9 focal populations used to**  
684 **assess trait variation. Across all collection records, species differ along PC1 ( $F(2, 82.2, P < 0.001)$  and**  
685 **PC2 ( $F(2, 59.76), P < 0.001$ ). Post-hoc Tukey tests indicated that all 3 species differed from one another**  
686 **for both PC1 and PC2 (all  $P$  values  $< 0.001$ ).**  
687

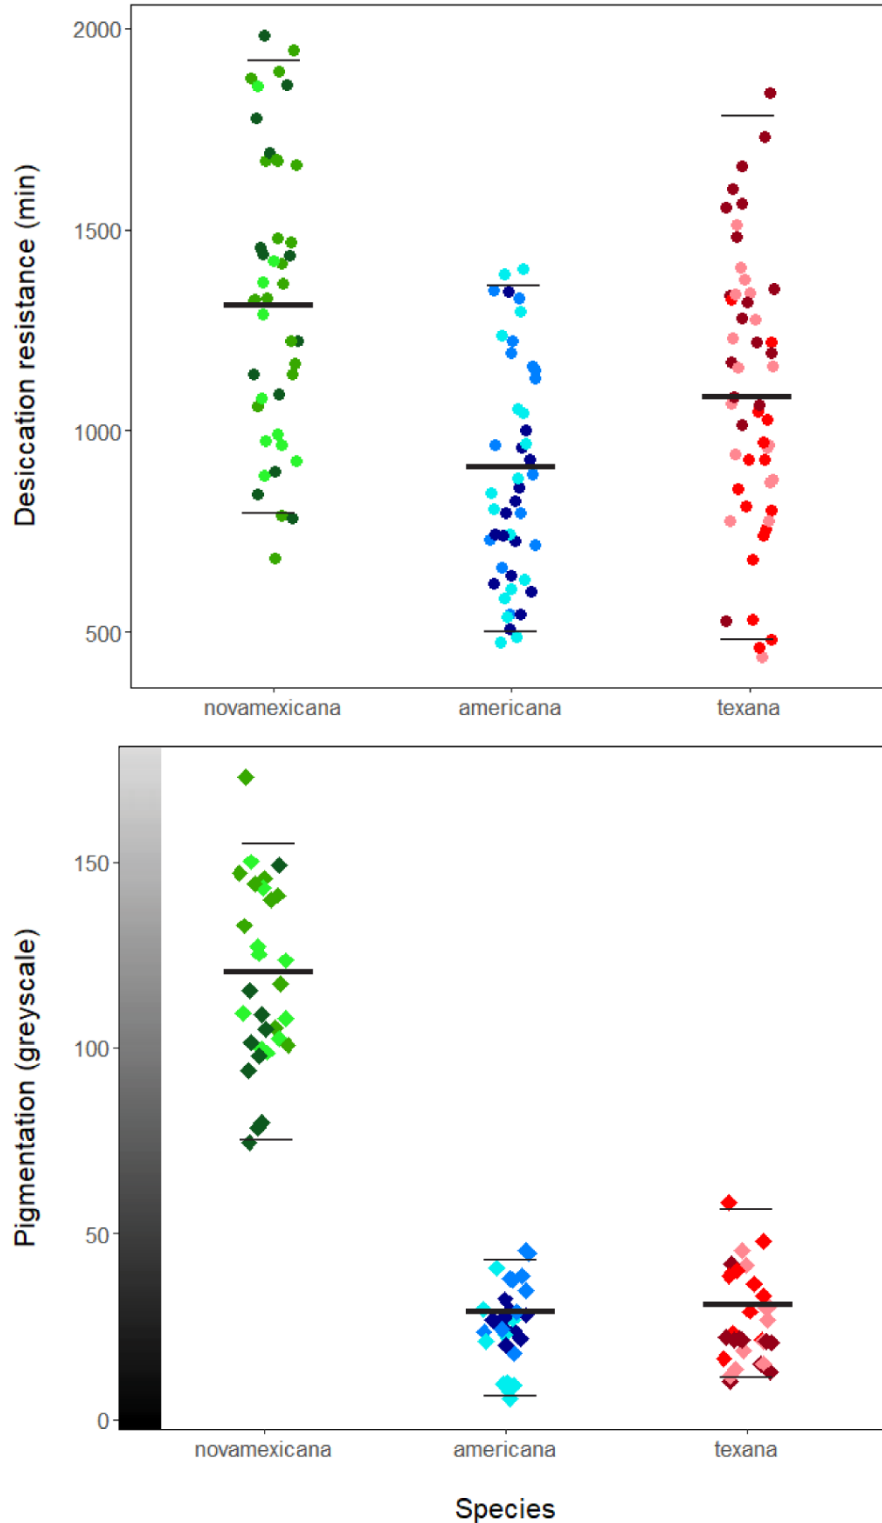

688

689 **Figure 3: Distribution of individual values for desiccation resistance (top, circles) and pigmentation**  
690 **(bottom, diamonds), according to species (X axis) and population within species (shade variation**  
691 **among points). The y-axis values for individual cuticles on the pigmentation graph correspond to a**  
692 **computed greyscale value represented by the gradient bar. The thick bars indicate species means; thin**

693 bars indicate 95% confidence intervals around the mean. Desiccation resistance differs between  
694 species ( $F(2, 29.76)$ ;  $P < 0.0001$ ) and populations within species ( $F(6, 4.48)$ ;  $P = 0.0004$ ). Post-hoc tests  
695 indicate significant differences in all pairwise contrasts ( $D.nov - D.am$ :  $P < 0.0001$ ,  $D.nov - D.tex$ :  $P =$   
696  $0.00039$ ;  $D.am - D.tex$ :  $P = 0.0023$ ). Pigmentation differs between both species ( $F(2, 11.86)$ ,  $P <$   
697  $0.0001$ ) and populations within species ( $F(6, 3.13)$ ,  $P = 0.0083$ ). Post-hoc contrasts indicate  $D.$   
698 *novamexicana* is significantly lighter than  $D. a. americana$  ( $P < 0.0001$ ) and  $D. a. texana$  ( $P < 0.0001$ );  
699  $D. a. americana$  and  $D. a. texana$  do not differ ( $P = 0.96$ ).  
700



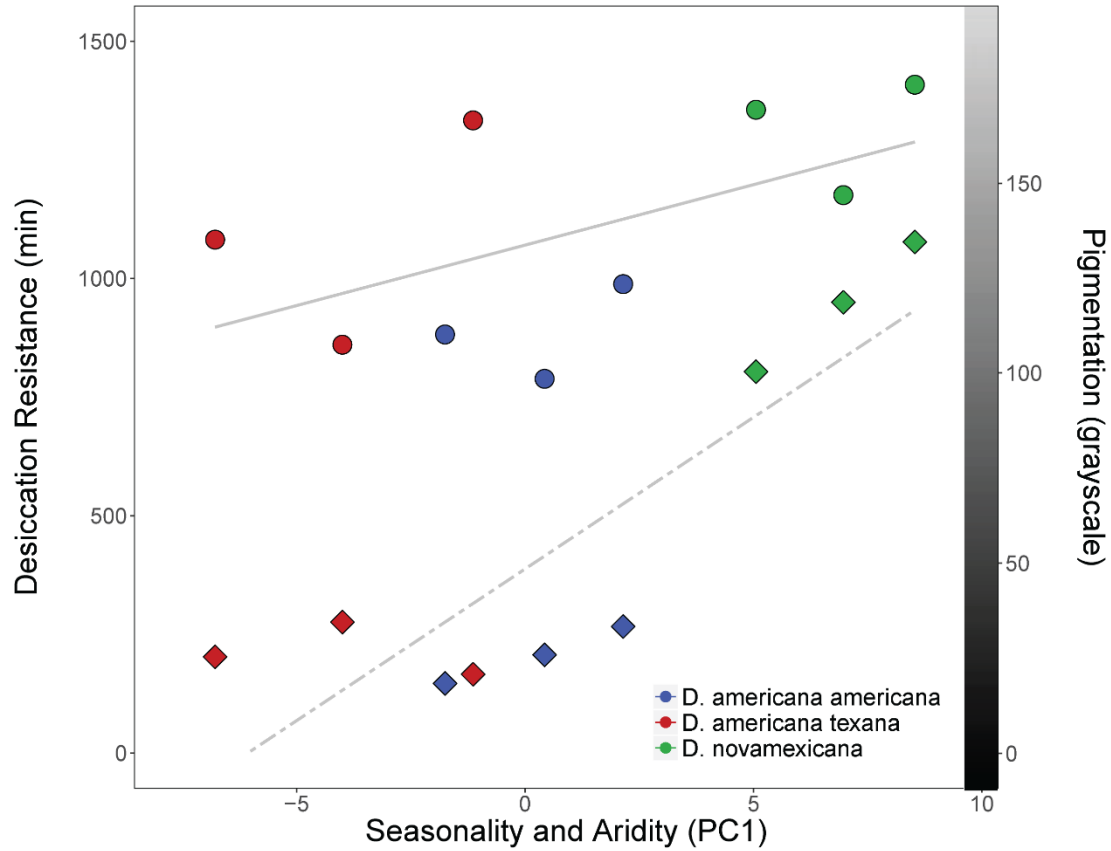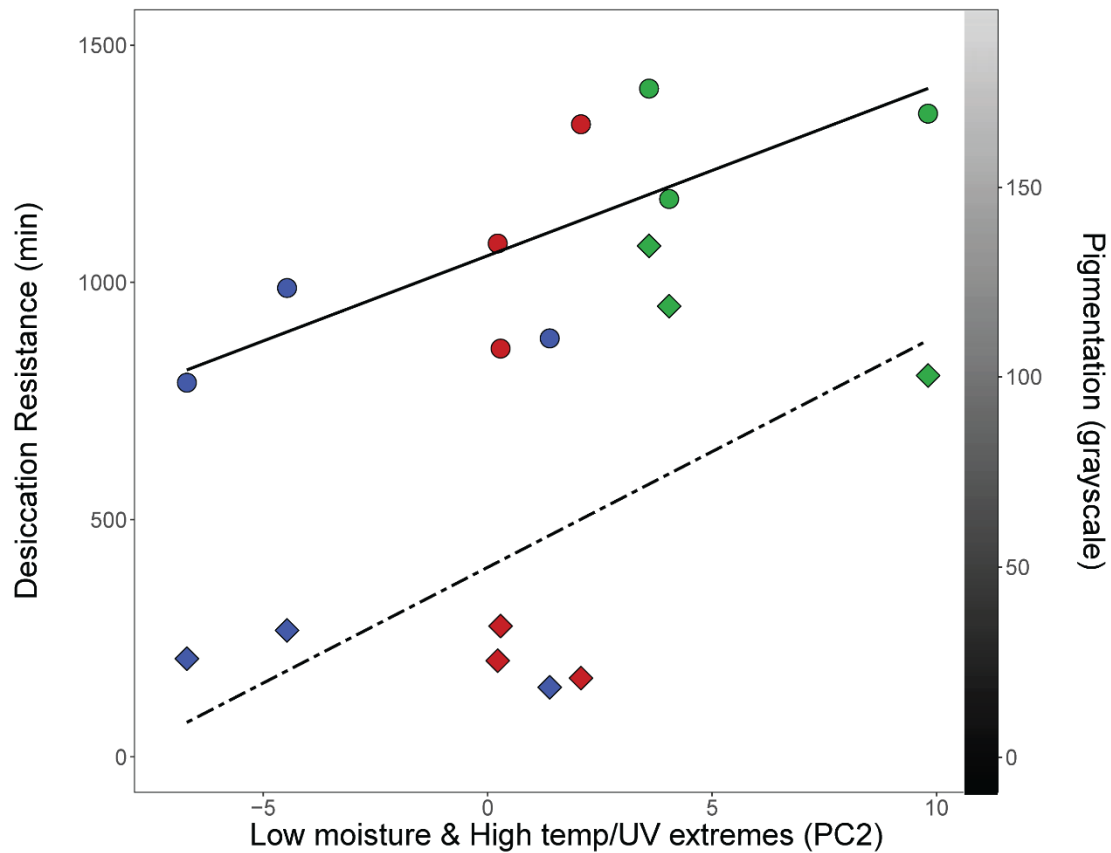

702 **Figure 4: Relationship between mean desiccation resistance (circles) or pigmentation (diamonds) in**  
703 **each population and PC1 (top panel) or PC2 (bottom panel). The left-side y-axis corresponds to**  
704 **desiccation resistance in minutes survived, while the right-side y-axis show pigmentation values on**  
705 **that correspond to a greyscale value represented by the gradient bar. PC1 is not significantly**  
706 **associated with desiccation resistance ( $r(7) = 0.15$ ;  $P = 0.71$ ) or pigmentation ( $r(7) = 0.53$ ;  $P = 0.15$ ) was**  
707 **across all 9 populations (top, grey trend lines). PC2 is associated with both desiccation resistance ( $r(7)$**   
708 **= 0.74;  $P = 0.022$ ) and pigmentation ( $r(7) = 0.68$ ;  $P = 0.044$ ) (bottom, black trend lines), prior to**  
709 **multiple testing correction.**
